# Supplementary material for: Phosphorus-doped Ti3C2Tx MXene nanosheets enabling ambient NH3 synthesis with high current densities
Source: Royal Society of Chemistry journal article supplement (doi:10.1039/d4cc03051f), 2024-01-01
Supplement: d4cc03051f1.pdf [file d4cc03051f1.pdf]

## Supporting Information

### **Phosphorus-doped $Ti_3C_2T_x$ MXene nanosheets enabling ambient $NH_3$ synthesis with high current densities**

**Yuchuan Qi<sup>a†</sup>, Xianghua Hou<sup>a†</sup>, Ziyang He<sup>b\*</sup>, Fan He<sup>a</sup>, Tianran Wei<sup>b,c</sup>, Ge Meng<sup>a\*</sup>, Huihui Hu<sup>c</sup>, Qian Liu<sup>d</sup>, Guangzhi Hu<sup>e</sup>, and Xijun Liu<sup>c\*</sup>**

*a* Key Laboratory of Carbon Materials of Zhejiang Province, College of Chemistry and Materials Engineering, Wenzhou University, Wenzhou 325035, China. E-mail: mengge@wzu.edu.cn.

*b* Guangxi Vocational & Technical Institute of Industry, Nanning 530001 Guangxi, China. E-mail: 2021028852@gxgy.edu.cn.

*c* State Key Laboratory of Featured Metal Materials and Life-cycle Safety for Composite Structures, MOE Key Laboratory of New Processing Technology for Nonferrous Metals and Materials, School of Resources, Environment and Materials, Guangxi University, Nanning, 530004 Guangxi, China. E-mail: xjliu@gxu.edu.cn.

*d* Institute for Advanced Study, Chengdu University, Chengdu 610106, Sichuan, China.

*e* Institute for Ecological Research and Pollution Control of Plateau Lakes School of Ecology and Environmental Science, Yunnan University, Kunming 650504, China.

† These authors contributed equally to this work.

## **Experimental section**

### ***Chemicals***

Lithium fluoride (LiF), and  $Ti_3AlC_2$  powders were purchased from Macklin Reagent Company. Hydrochloric acid (HCl, 37.2%), potassium nitrate ( $KNO_3$ ), and potassium sulfate anhydrous ( $K_2SO_4$ ) were purchased from Aladdin Ltd (China). Nafion solution (5 wt%) were purchased from Alfa Aesar. Note that all the chemicals (analytical grade) were purchased from Aladdin and used directly without further purification here. Deionized water was purified through a Millipore system.

### ***Synthesis of P- $Ti_3C_2T_x$ MXene nanosheets***

2D  $Ti_3C_2T_x$  MXene nanosheets were synthesized via a reported procedure according to our previous literature [1]. After that, the obtained  $Ti_3C_2T_x$  was mixed with  $NaH_2PO_2$  in two crucibles and the weight ratio of  $Ti_3C_2T_x$  and  $NaH_2PO_2$  was set to 1:2, 1:3, 1:5, and 1:7. After that, the residue was annealed in a tube at 500 °C for 3 h under an Ar atmosphere. The annealed sample was washed with 70 °C deionized water and ethanol to remove any residual chemicals, followed by drying in a vacuum oven. The reference  $Ti_3C_2T_x$  sample was prepared using the same procedure but in the absence of  $NaH_2PO_2$ .

### ***Material characterizations***

The structural and micro-morphological features of these samples were taken from a JSM 6300F field emission scanning electron- microscope (SEM)

(JEOL) as well as a Tecnai G2 F30 transmission electron microscope (TEM) (FEI). At the same time, their crystal structure and phase composition were analyzed via an X-ray diffractometer (XRD) (PANalytical X'Pert Pro diffractometer) with Cu K $\alpha$  radiation ( $\lambda = 1.5406 \text{ \AA}$ ). Further, the chemical environment of the samples was recorded by the X-ray photoelectron spectrometer (XPS) from the Thermo Scientific K-Alpha (Shimadzu Kratos) with an Al (K $\alpha$ ) radiation probe ( $\lambda = 0.834 \text{ nm}$ ) and calibrated with C 1s of 284.8 eV.

### ***NO<sub>3</sub>RR tests***

The electrochemical tests were performed in an electrolyte consisting of 0.5 M K<sub>2</sub>SO<sub>4</sub> and 0.1 M KNO<sub>3</sub> by using an H-cell with a three-electrode configuration and separated by the proton exchange membrane (Nafion-117). The data was collected by the CHI 760E electrochemical workstation. To prepare the working electrode, 5 mg P-Ti<sub>3</sub>C<sub>2</sub>T<sub>x</sub> powder was homogeneously dispersed in a 1 mL mixture (50  $\mu$ L 5 wt% Nafion and 950  $\mu$ L 5 wt% EtOH) to obtain a catalyst ink, and then 30  $\mu$ L ink was loaded onto carbon paper to get working electrode (0.15 mg cm<sup>-2</sup>). The graphite rod and saturated Hg/Hg<sub>2</sub>Cl<sub>2</sub> were employed as counter electrode and reference electrode, respectively. All applied potentials were converted to the reversible hydrogen electrode (RHE):  
$$E \text{ (vs RHE)} = E \text{ (vs Hg/Hg}_2\text{Cl}_2) + 0.244 + 0.0591 \times \text{pH.}$$
 Quantification of NH<sub>3</sub> from NO<sub>3</sub>RR was performed with a UV-Vis spectrometer (Shimadzu UV-2700).

### ***Flow cell measurements***

In the flow cell, the anodic and cathodic chambers were separated by a piece of proton exchange membrane (Nafion 211). A piece of commercial gas diffusion electrode (GDE, YLS-30T) was used to separate the cathodic chamber and NH<sub>3</sub> capture chamber. The side of the GDE loaded with catalyst was in contact with the cathode chamber, while the back side was in contact with the NH<sub>3</sub> capture chamber. A piece of GDE, Ni rod, and Hg/Hg<sub>2</sub>Cl<sub>2</sub> electrode were used as working electrode, counter electrode, and reference electrode, respectively. During the NO<sub>3</sub>RR test, the cathodic electrolyte (1 M K<sub>2</sub>SO<sub>4</sub> + 0.5 M KNO<sub>3</sub>) was continuously cycled through the cathode chamber with a rate of 60 mL min<sup>-1</sup> under the pump drive. The 0.25 M H<sub>2</sub>SO<sub>4</sub> solution was adopted to capture NH<sub>3</sub>, and the flow rate was also set to 60 mL min<sup>-1</sup>.

Determination of NH<sub>3</sub>: Ammonia produced in the NO<sub>3</sub>RR process was colored by the indophenol blue method and detected by the UV-Vis spectroscopy (IR Tracer-100, Shimadzu). Due to the high concentration of the product, all electrolytes after electrolysis were diluted 20 times before color development. After 1 hour of electrolysis, 2 mL of electrolyte was taken from the cathode cell, followed mixing with 2 mL colorant (containing salicylic acid, sodium citrate and sodium hydroxide), 1 mL of oxidant (0.05 M sodium hypochlorite), and 0.2 mL of catalyst solution (1 wt% sodium nitroferricyanide). Then, they were placed in the dark environment for 1 h, and the UV-Vis spectra were measured in the wavelength range from 550 to 800 nm. The absorption

intensity at 655 nm was substituted into the standard curve to quantify the ammonia yield.

Determination of  $\text{NO}_2^-$ : The method Griess Test was employed to detect the generated  $\text{NO}_2^-$  during electrolysis. For quantifying  $\text{NO}_2^-$ , a specific color reagent was prepared as follows: 0.4 g of p-aminobenzene sulfonamide and 0.02 g of N-(1-naphthyl) ethylenediamine dihydrochloride were dissolved in a mixture containing 5 mL of deionized water and 1 mL of phosphoric acid ( $\rho = 1.70 \text{ g/mL}$ ). To begin the detection process, a certain amount of electrolyte was extracted from the electrolytic cell and diluted to 5 mL to fit within the detection range. Next, 0.1 mL of the color reagent was added to the 5 mL of diluted electrolyte. The solution was left to stand for 20 min before testing, and its absorbance was measured using UV-Vis spectrophotometry at a wavelength of 540 nm.

Determination of  $\text{N}_2\text{H}_4$ : After 1 h of electrolysis, the electrolyte was diluted 16-fold to 2.5 mL, and 5.99 g of pp-dimethylamino benzaldehyde, 30 mL of hydrochloric acid, and 300 mL of ethanol were mixed into a uniform solution, which was used as a chromogen. Then, 2 mL of chromogen was added to 2 mL of electrolyte. After 20 minutes in dark, absorbance was performed at a wavelength from 420 to 500 nm. The absorbance at 455 nm is substituted into the standard curve to obtain the concentration of hydrazine.

Determination of  $\text{H}_2$ : The quantity of produced  $\text{H}_2$  gas was assessed using Gas chromatography (7890A, Agilent) equipped with both a flame ionization

detector (FID) and a thermal conductivity detector (TCD). The thermal conductivity detector was utilized specifically for hydrogen quantification. All experiments were carried out within a sealed system.

### ***DFT details***

The P-Ti<sub>3</sub>C<sub>2</sub>T<sub>x</sub> model was constructed according to the report [1,2] under the density functional theory (DFT) in the Dmol<sup>3</sup> code. The lattice structure was set to periodic 2x2 unit cells, i.e., each structure has four layers of metal atoms including the fixed two layer bottom atom as well as other relaxed two layer atom for adsorbing objects. To analyze the Perdew-Burke-Emzerhof (PBE) exchange effect and related influence under the condition of generalized gradient approximation, the vacuum space was set to 15 Å. And, the Brillouin zone was sampled with 3 × 3 × 1, the real space global orbit truncation radius is set to 4.5 Å. Nuclear processes and atomic charges were analyzed by the effective core potential (ECP) and Hirshfeld method, respectively.

The free energy of atomic structure is determined as follows:

$$\Delta G = \Delta E + \Delta ZPVE + \int C_p dT - T \Delta S,$$

where  $\Delta E$  is the change of adsorption energy,  $\Delta ZPVE$  is the difference of zero-point energy, and  $\Delta S$  is the difference of entropy,  $C_p$  is the heat capacity, and  $T$  is the system temperature.

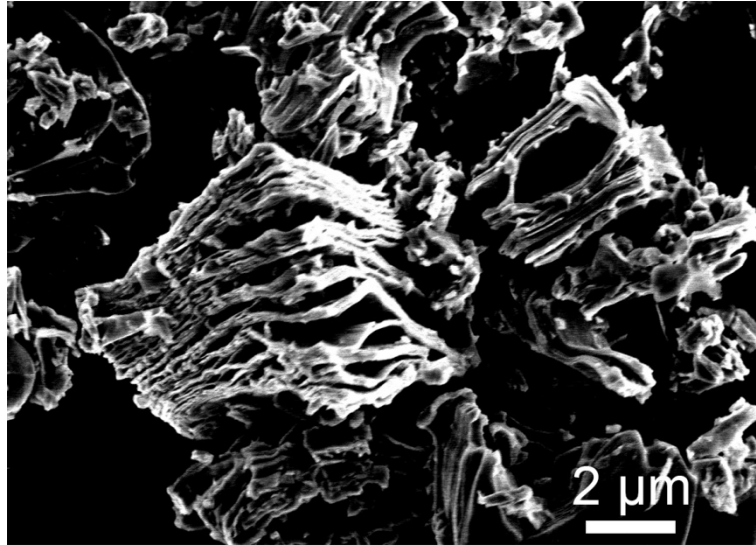

**Figure S1.** SEM image of the Ti<sub>3</sub>C<sub>2</sub>T<sub>x</sub> nanosheets.

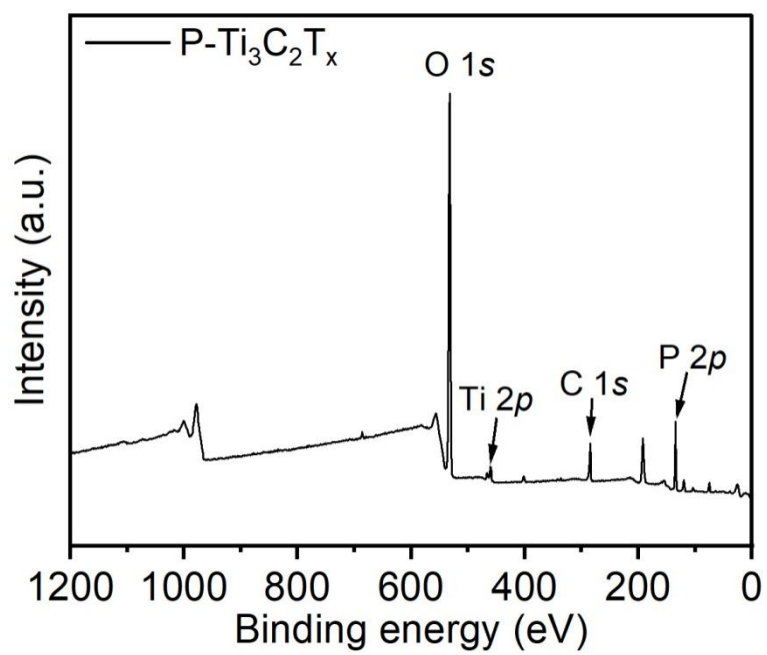

**Figure S2.** XPS survey spectrum for P-Ti<sub>3</sub>C<sub>2</sub>T<sub>x</sub>.



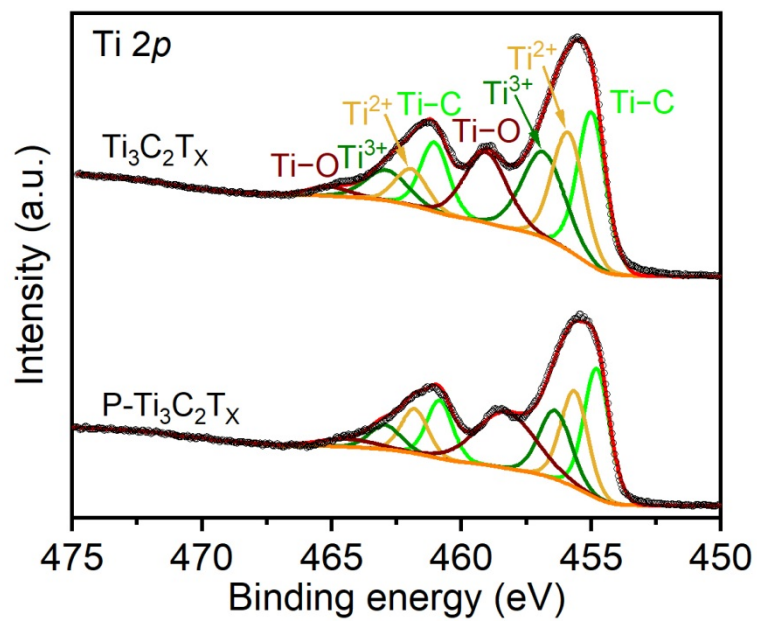

**Figure S3.** High-resolution Ti 2p XPS spectrum for P- $\text{Ti}_3\text{C}_2\text{T}_x$ .

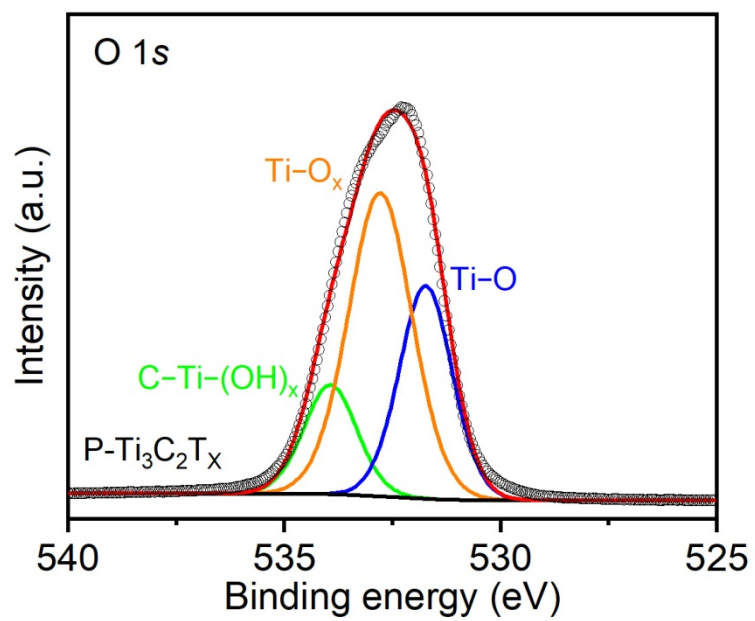

**Figure S4.** High-resolution O 1s XPS spectrum for P-Ti<sub>3</sub>C<sub>2</sub>T<sub>x</sub>.

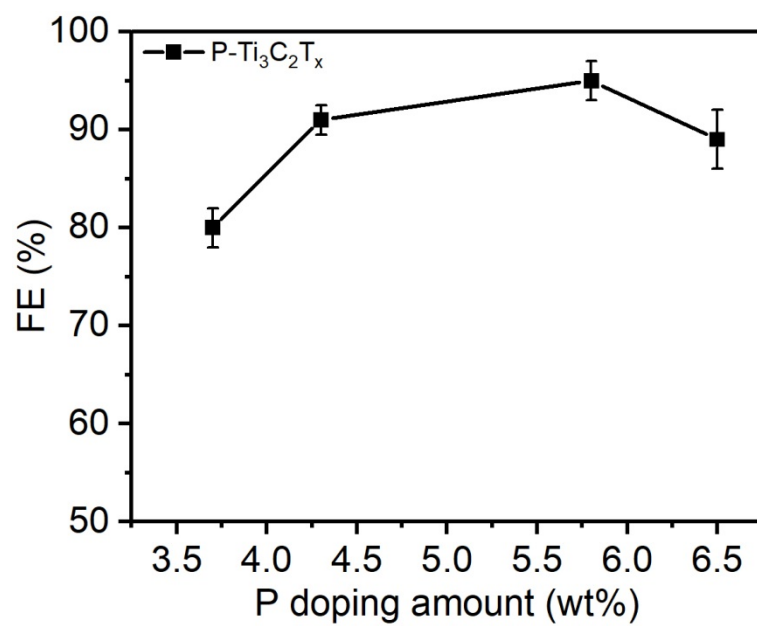

**Figure S5.** The NH<sub>3</sub> yield rates of the P-Ti<sub>3</sub>C<sub>2</sub>T<sub>x</sub> with different P doping amount performed at -1.2 V vs RHE.

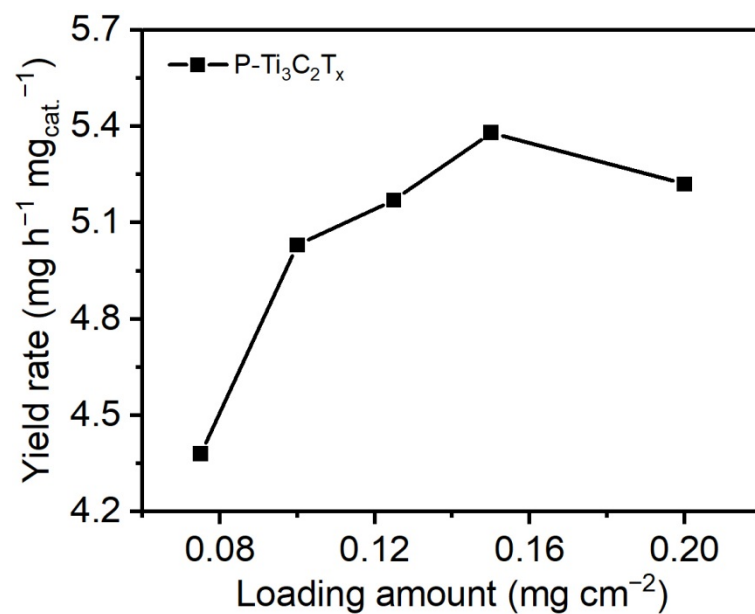

**Figure S6.** The NH<sub>3</sub> yield rates of the P-Ti<sub>3</sub>C<sub>2</sub>T<sub>x</sub> with different catalyst loading amount performed at -1.2 V vs RHE.

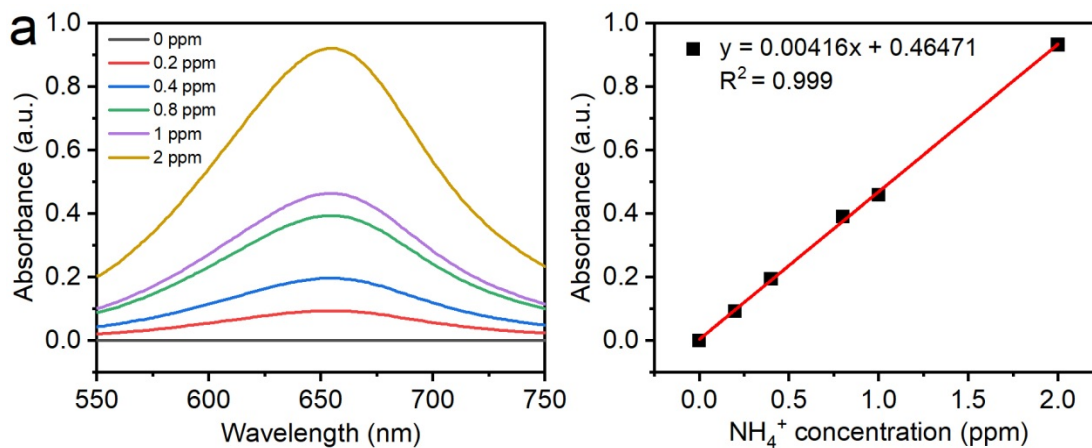

**Figure S7.** (a) UV-Vis absorption spectra of different concentrations of  $\text{NH}_3$  stained with indophenol blue and (b) the corresponding calibration curve.

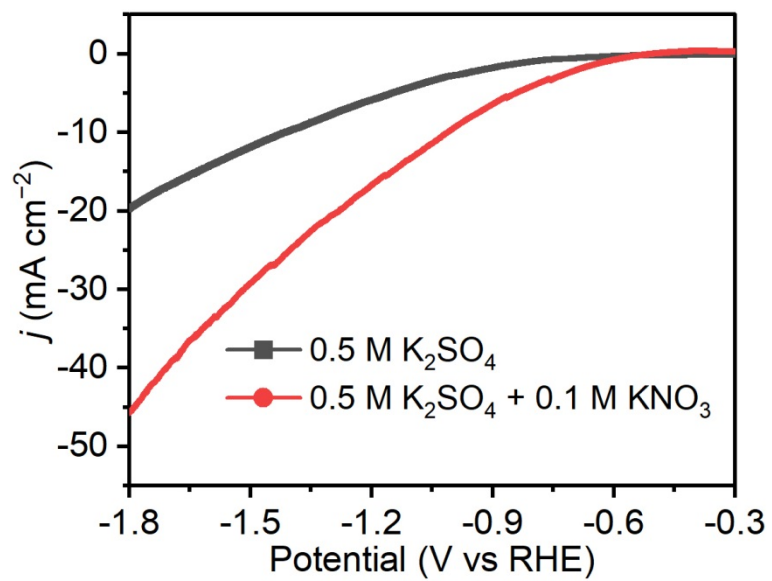

**Figure S8.** LSV curves of P-Ti<sub>3</sub>C<sub>2</sub>T<sub>x</sub> recorded in different electrolytes.

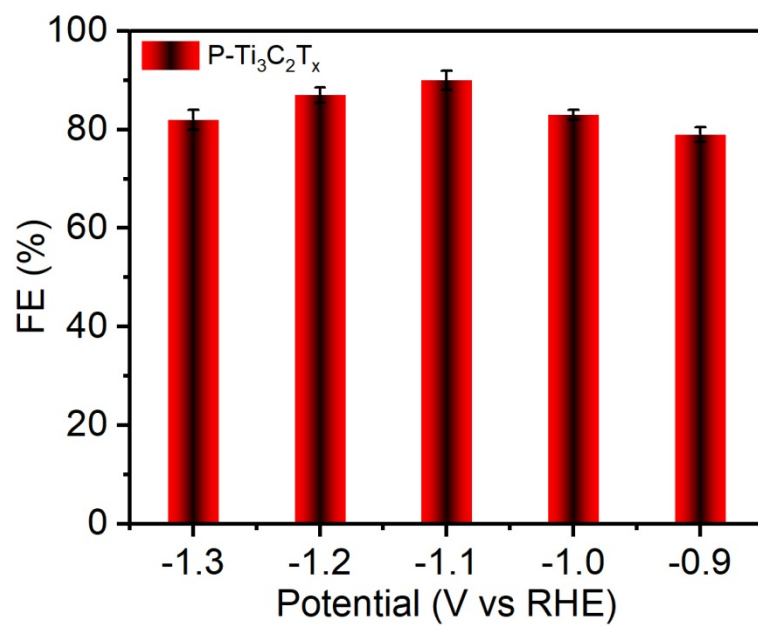

**Figure S9.** The obtained FEs and yield rates for P-Ti<sub>3</sub>C<sub>2</sub>T<sub>x</sub> in a electrolyte with 0.5 M K<sub>2</sub>SO<sub>4</sub> + 0.05 M KNO<sub>3</sub>.

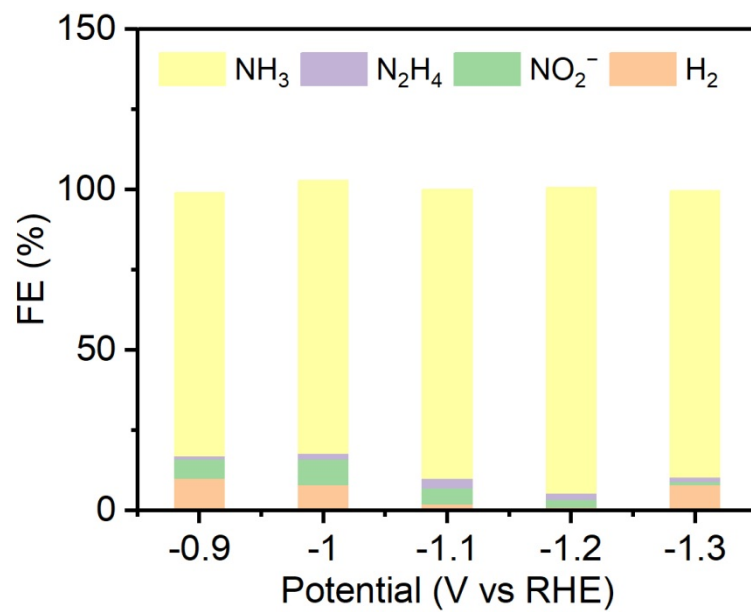

**Figure S10.** The FEs for the by-products of P-Ti<sub>3</sub>C<sub>2</sub>T<sub>x</sub>.



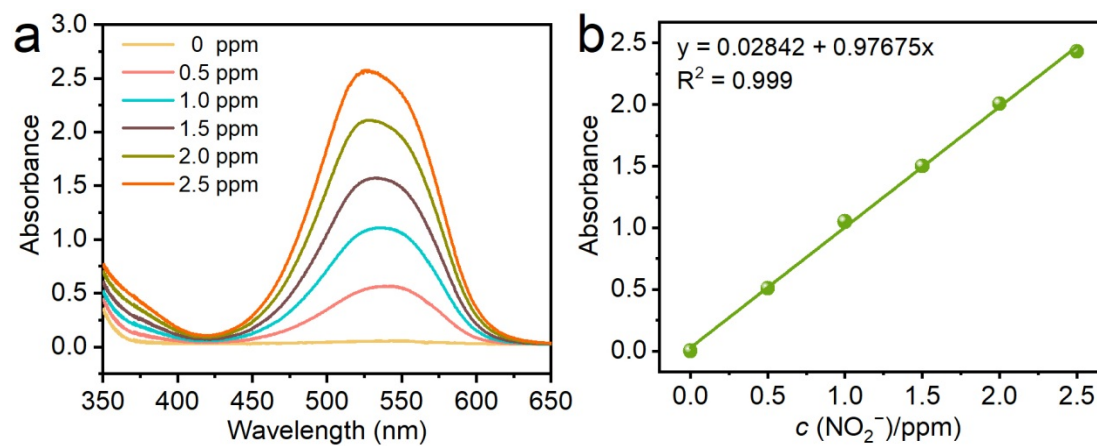

**Figure S11.** (a) UV-Vis absorption spectra of various concentrations of  $\text{NO}_2^-$  and (b) the corresponding calibration curve.

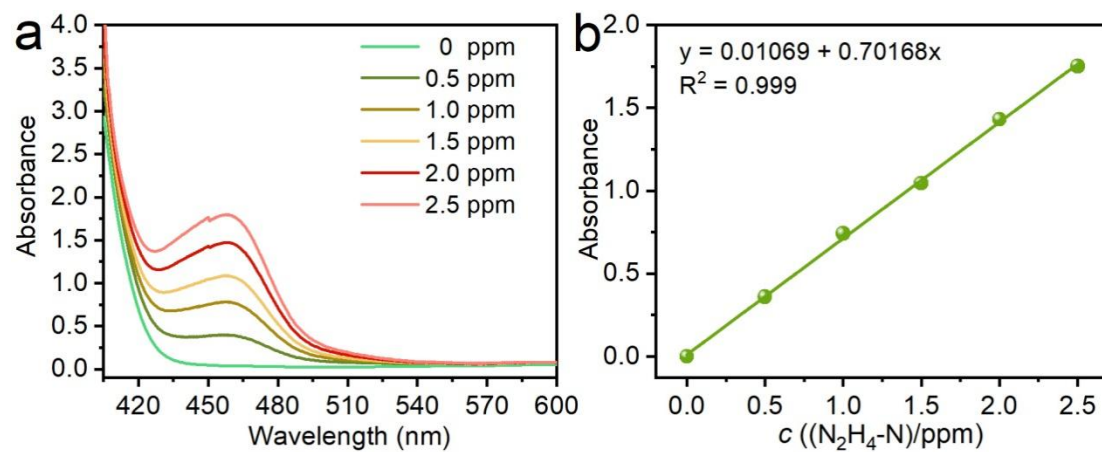

**Figure S12.** (a) UV-Vis absorption spectra of various concentrations of  $N_2H_4$  and (b) the corresponding calibration curve.

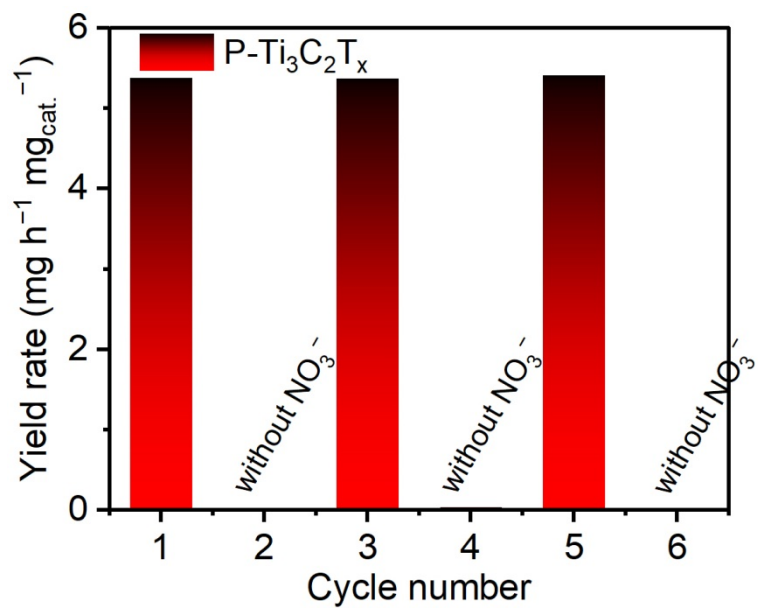

**Figure S13.** NO<sub>3</sub>RR performance of P-Ti<sub>3</sub>C<sub>2</sub>T<sub>x</sub> after the alternating cycle measurement.

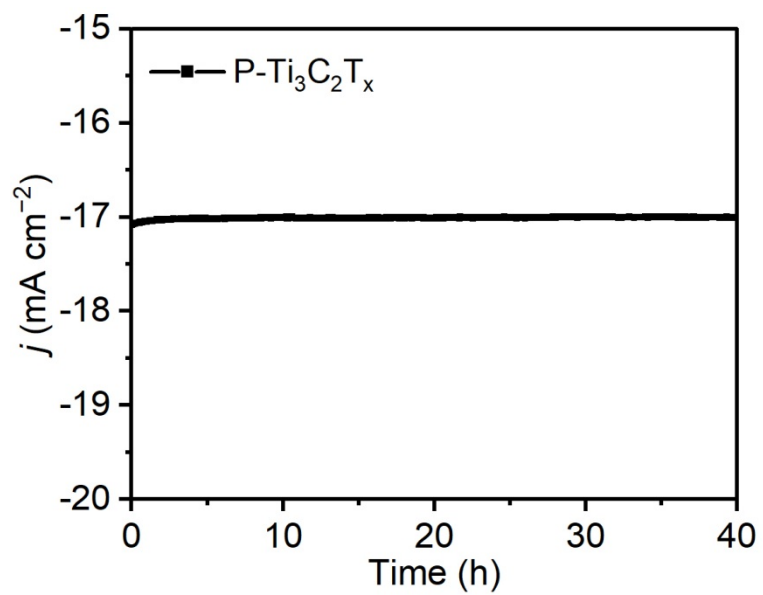

**Figure S14.** Long-term electrolysis at  $-1.2$  V vs RHE over 40 h.

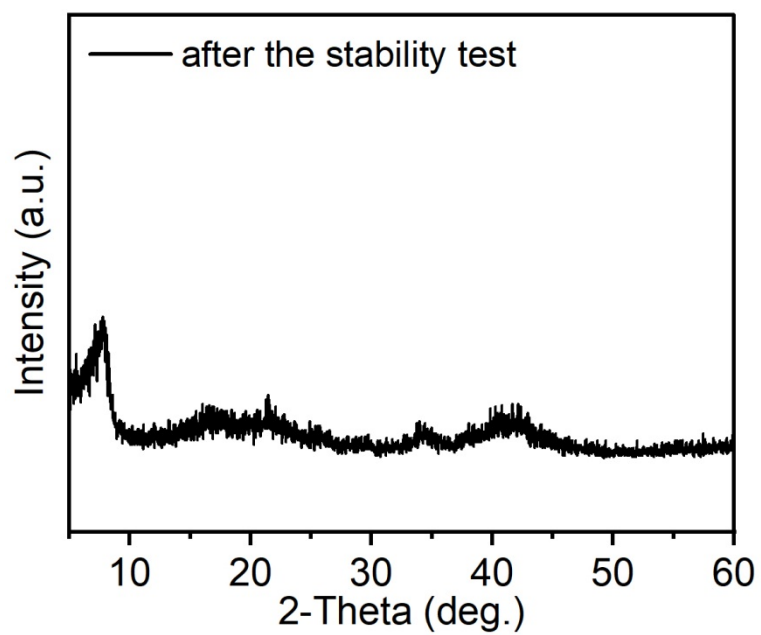

**Figure S15.** XRD pattern of the post-electrolysis P-Ti<sub>3</sub>C<sub>2</sub>T<sub>x</sub>.

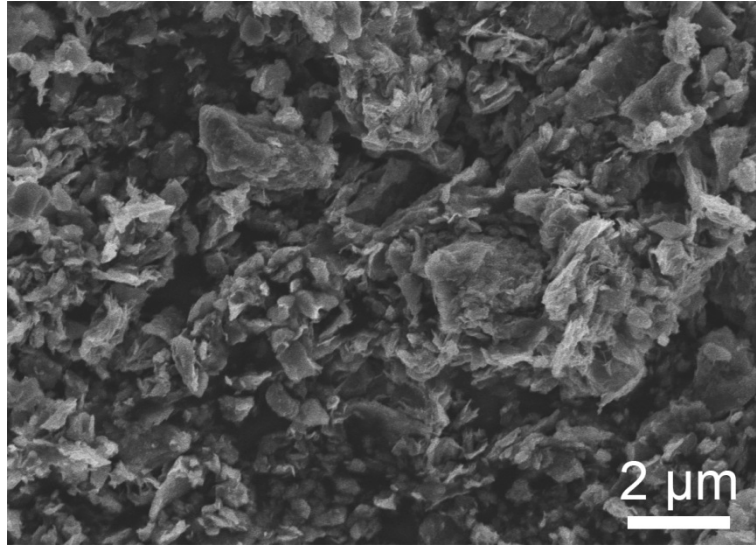

**Figure S16.** SEM image of the post-electrolysis P-Ti<sub>3</sub>C<sub>2</sub>T<sub>x</sub>.

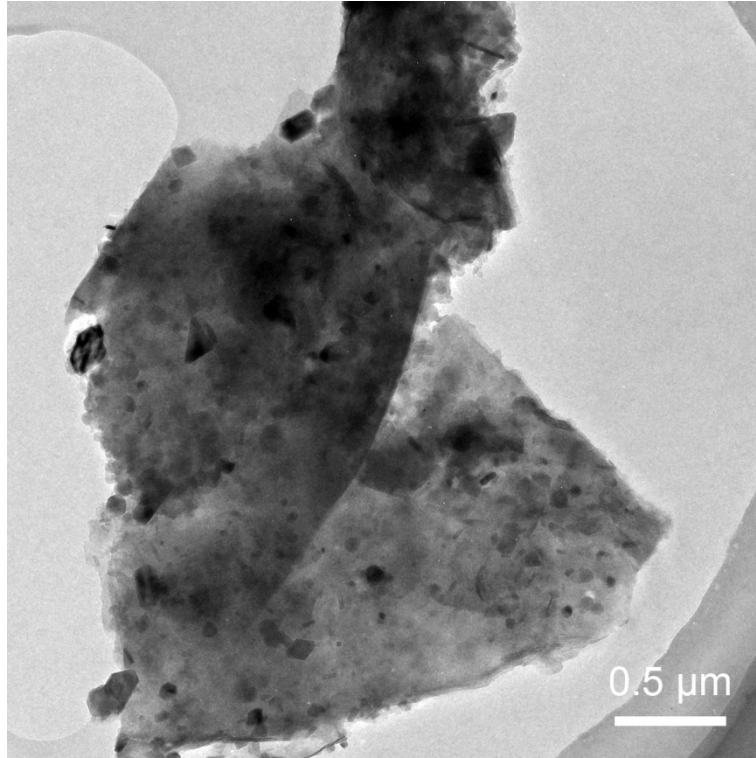

**Figure S17.** TEM image of the post-electrolysis P-Ti<sub>3</sub>C<sub>2</sub>T<sub>x</sub>.

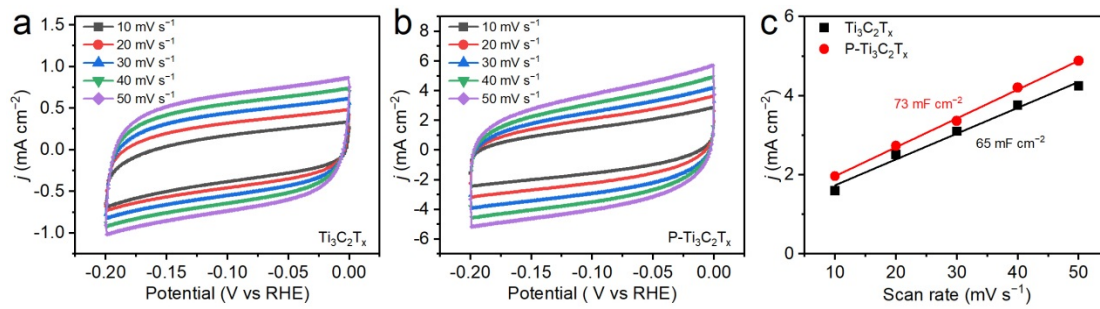

**Figure S18.** (a) CV curves and (b)  $C_{dl}$  measurements of  $\text{Ti}_3\text{C}_2\text{T}_x$  and P-

$\text{Ti}_3\text{C}_2\text{T}_x$ .



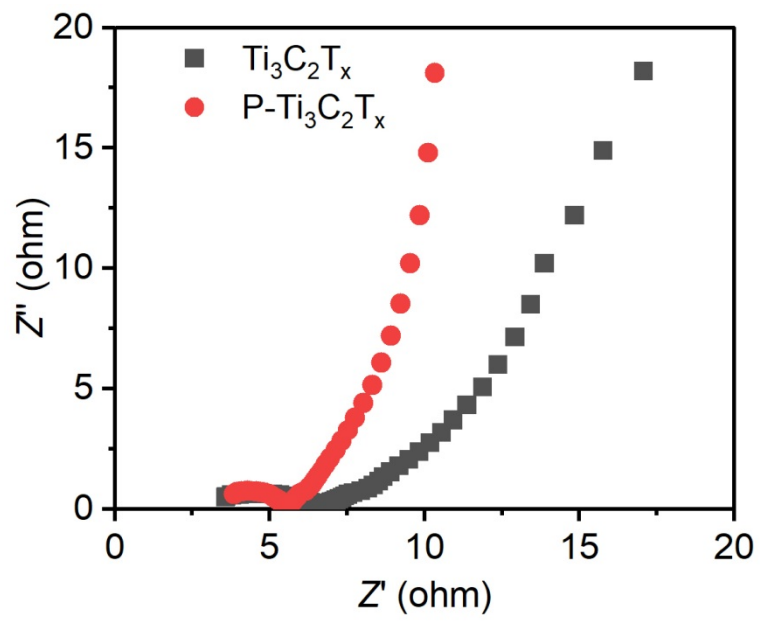

**Figure S19.** Nyquist plots of  $Ti_3C_2T_x$  and  $P-Ti_3C_2T_x$ .

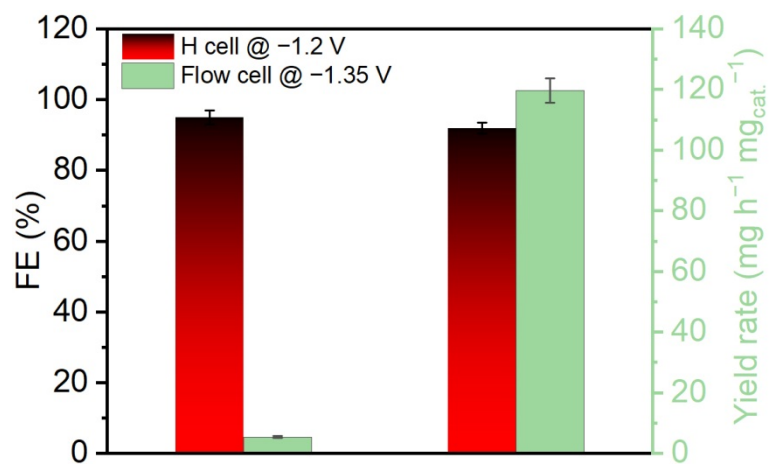

**Figure S20.** The obtained FE and yield rate at optimal potentials for H cell versus flow cell.

**Table S1.** Comparisons of the obtained yield rates and FEs in a H-cell.

| Catalyst                                         | Electrolyte                                                                                         | Operating potential     | NH <sub>3</sub> Production Rate                          | FE <sub>NH<sub>3</sub></sub> | Ref.                                         |
|--------------------------------------------------|-----------------------------------------------------------------------------------------------------|-------------------------|----------------------------------------------------------|------------------------------|----------------------------------------------|
| <b>Rh@Cu SA</b>                                  | 0.1 M Na <sub>2</sub> SO <sub>4</sub> with 0.1 M KNO <sub>3</sub>                                   | -0.2 V vs. RHE          | 1.27 mmol h <sup>-1</sup> cm <sup>-2</sup>               | 93%                          | Angew. Chem. Int. Ed. 2022, 61: e202202556   |
| <b>Cu-Pd/C nanobelts</b>                         | 0.1 M KOH with 10 mM KNO <sub>3</sub>                                                               | -0.4 V vs. RHE          | 220.8 μg mg <sub>cat</sub> <sup>-1</sup> h <sup>-1</sup> | 62.3%                        | ACS Appl. Mater. Interfaces. 2022, 14: 30969 |
| <b>Cu-CuO</b>                                    | 0.5 M Na <sub>2</sub> SO <sub>4</sub> and 50 mM NaNO <sub>3</sub>                                   | -0.8 V vs. RHE          | 3.17 mol h <sup>-1</sup> g <sup>-1</sup>                 | 98.7 %.                      | J Hazard Mater. 2022, 439: 129653            |
| <b>Cu<sub>2</sub>O/CuO@C</b>                     | 1.0 M KOH + 50 mM KNO <sub>3</sub>                                                                  | -0.25 V vs. RHE         | 0.046 mmol h <sup>-1</sup> cm <sup>-2</sup>              | 93.05%                       | J. Power Sources. 2022, 204: 543             |
| <b>CoP/TiO<sub>2</sub>@TP</b>                    | 0.1 M NaOH with 0.1 M NaNO <sub>3</sub>                                                             | -0.5 V / -0.3 V vs. RHE | 499.8 μmol h <sup>-1</sup> cm <sup>-2</sup>              | 95.0%                        | Mater. Today Phys. 2022; 28:100854           |
| <b>Co/CoO NSAs</b>                               | 0.1 M Na <sub>2</sub> SO <sub>4</sub>                                                               | -1.3 V vs. SCE          | 194.46 μmol h <sup>-1</sup> cm <sup>-2</sup>             | 93.8%                        | Sci. China Chem. 2020, 63: 1469              |
| <b>FeOOH/CP</b>                                  | 0.1 M PBS with 0.1 M NaNO <sub>3</sub>                                                              | -0.5 V / -0.8 V vs. RHE | 2,419 μg h <sup>-1</sup> cm <sup>-2</sup>                | 92%                          | ACS Appl. Mater. Interfaces. 2022, 14: 17312 |
| <b>TiO<sub>2-x</sub></b>                         | 0.5 M Na <sub>2</sub> SO <sub>4</sub>                                                               | -1.6 V Vs. SCE          | 0.045 mmol h <sup>-1</sup> mg <sup>-1</sup>              | 85.0%                        | ACS Catal. 2020; 10:3533                     |
| <b>CoO<sub>x</sub> nanosheets</b>                | 0.1 M KOH                                                                                           | -0.3 V vs. RHE          | 36.62 mg h <sup>-1</sup> cm <sup>-2</sup>                | 93.4±3.8%                    | ACS Catal. 2021; 11:15135                    |
| <b>Co<sub>3</sub>O<sub>4</sub> nanoparticles</b> | 0.11 M in 1 M NaOH                                                                                  | -0.7 V vs. RHE          | 39.60 mg h <sup>-1</sup> cm <sup>-2</sup>                | 96.08%                       | Adv. Energy Mater. 2022, 12: 2202105         |
| <b>Ag/Cu<sub>2</sub>O</b>                        | 0.5 M Na <sub>2</sub> SO <sub>4</sub>                                                               | -0.80 V vs. RHE         | 0.225 mmol h <sup>-1</sup> cm <sup>-2</sup>              | 96.45%                       | J. Catal. 2022; 406:39                       |
| <b>PdCoO/NF</b>                                  | 0.5 M K <sub>2</sub> SO <sub>4</sub> with 200 mg L <sup>-1</sup> of NO <sub>3</sub> <sup>-</sup> -N | -1.3 V vs. SCE          | 0.2044 mmol h <sup>-1</sup> cm <sup>-2</sup>             | 88.6%                        | ACS Appl. Mater. Interfaces. 2022, 14: 13169 |
| <b>Rh<sub>x</sub>S<sub>y</sub>/C</b>             | 0.1 M HNO <sub>3</sub>                                                                              | 0.1 V vs. RHE           |                                                          | 67%                          | Catal. Sci. Technol. 2021; 11:7331           |

|                                                   |                                                                   |                                |                                                              |       |                                          |
|---------------------------------------------------|-------------------------------------------------------------------|--------------------------------|--------------------------------------------------------------|-------|------------------------------------------|
| <b>Fe-SnS<sub>2</sub>/CC</b>                      | 0.1 M NaNO <sub>3</sub>                                           | -0.8 V / -<br>0.7 V vs.<br>RHE | 7.2 mg h <sup>-1</sup> cm <sup>-2</sup>                      | 85.6% | Dalton Trans.<br>2022, 51: 10343         |
| <b>Cu-SnS<sub>2-x</sub></b>                       | 0.1M KNO <sub>3</sub>                                             | -0.7 V vs.<br>RHE              | 0.63 mmol h <sup>-1</sup><br>mg <sub>cat</sub> <sup>-1</sup> | 93.8% | J. Mater. Chem.<br>A, 2023, 11:<br>2014  |
| <b>NCS-2</b>                                      | 1 M KOH                                                           | -0.4 V vs.<br>RHE              | 2,388.4 μg h <sup>-1</sup><br>cm <sup>-2</sup>               | 85.3% | Appl. Catal., B.<br>2023, 324:<br>122193 |
| <b>Fe SACs</b>                                    | 0.1M K <sub>2</sub> SO <sub>4</sub> and 0.5<br>M KNO <sub>3</sub> | -0.66 V<br>vs. RHE             | 0.46 mmol h <sup>-1</sup><br>cm <sup>-2</sup>                | ~ 75% | Nat Commun.<br>2021; 12:2870             |
| <b>P-Ti<sub>3</sub>C<sub>2</sub>T<sub>x</sub></b> | 0.5 M K <sub>2</sub> SO <sub>4</sub> + 0.1 M<br>KNO <sub>3</sub>  | -1.2 V vs<br>RHE               | 5.39 mg h <sup>-1</sup><br>mg <sub>cat</sub> <sup>-1</sup>   | 95%   | This work                                |

**Table S2.** Comparisons of the obtained yield rates and FEs in a flow-cell.

| Catalyst                                          | Electrolyte                                                 | Current density (mA cm <sup>-2</sup> ) | NH <sub>3</sub> Production Rate                          | FE <sub>NH3</sub>        | Ref.                                                  |
|---------------------------------------------------|-------------------------------------------------------------|----------------------------------------|----------------------------------------------------------|--------------------------|-------------------------------------------------------|
| <b>Bi-FeS<sub>2</sub></b>                         | 1 M KOH with 0.1 M NO <sub>3</sub> <sup>-</sup>             | 1023.2 @ -0.7 V vs. RHE                | 83.7 mg h <sup>-1</sup> cm <sup>-2</sup>                 | 99.2% (-0.7 V vs RHE)    | ACS Nano 2023, 17: 21328                              |
| <b>Cu/MnOOH</b>                                   | 1 M KOH with 0.5 M NO <sub>3</sub> <sup>-</sup>             | 700 @ -0.8 V vs. RHE                   | 55.51 mg h <sup>-1</sup> cm <sup>-2</sup>                | 96.8% (-0.8 V vs RHE)    | Chinese Chem. Lett. 2024, 10.1016/j.cclet.2024.109958 |
| <b>Co<sub>1-x</sub>Cu<sub>x</sub></b>             | 1 M KOH with 0.05 M NO <sub>3</sub> <sup>-</sup>            | 177 @ -0.03 V vs. RHE                  | NA                                                       | 95% (-0.03 V vs RHE)     | J. Phys. Chem. C 2022, 126: 6982                      |
| <b>NiCo LDH/Cu NW</b>                             | 1 M KOH with 0.1 M NO <sub>3</sub> <sup>-</sup>             | 570 @ -0.214 V vs. RHE                 | 2.72 mmol h <sup>-1</sup> cm <sup>-2</sup>               | 91.71% (-0.245 V vs RHE) | ACS Catal. 2023, 13: 14670                            |
| <b>Cu(x)-OMS-1</b>                                | 0.1 M NaOH with 0.1 M NaNO <sub>3</sub>                     | 148 @ -1.0 V vs. RHE                   | 0.69 mmol h <sup>-1</sup> cm <sup>-2</sup>               | 99.7% (-1.0 V vs RHE)    | Green Chem. 2023, 25: 10549                           |
| <b>Fe<sub>2</sub>O<sub>3</sub>/Fe-N-C</b>         | 1 M KOH + 0.16 M KNO <sub>3</sub>                           | 1265 @ -1.2 V vs. RHE                  | 6 mmol h <sup>-1</sup> cm <sup>-2</sup>                  | 90% (-0.4 V vs RHE)      | Adv. Mater. 2024, 2401133                             |
| <b>Co<sub>3</sub>O<sub>4</sub></b>                | 1 M KOH with 0.3 M NO <sub>3</sub> <sup>-</sup>             | 250 @ -0.25 V vs. RHE                  | ~1.35 mmol h <sup>-1</sup> cm <sup>-2</sup>              | 85.15% (-0.25 V vs RHE)  | Nao Res. 2024, 17: 3902                               |
| <b>P-Ti<sub>3</sub>C<sub>2</sub>T<sub>x</sub></b> | 1 M K <sub>2</sub> SO <sub>4</sub> + 0.5 M KNO <sub>3</sub> | 1000 @ -1.30 V vs. RHE                 | 123.5 mg h <sup>-1</sup> mg <sub>cal</sub> <sup>-1</sup> | 92%                      | This work                                             |

## References

- [1] Y. Ren, F. Tian, L. Jin, Y. Wang, J. Yang, S. You and Y. Liu, *Environ. Sci. Technol.* **2023**, 57, 10458.
- [2] X. Yang, G. Wei, J. Cao, Z. Ding, R. Yuan, J. Long and C. Xu, *ACS Sustain. Chem. Eng.* **2024**, 12, 3378-3389.
